# Supplementary material for: Large-scale facile synthesis of Fe-doped SnO2porous hierarchical nanostructures and their enhanced lithium storage properties
Source: Royal Society of Chemistry journal article supplement (doi:10.1039/c4ta02077d), 2014-06-24
Supplement: c4ta02077d1.pdf [file c4ta02077d1.pdf]

Electronic Supplementary Information (ESI) for

**Large-scale facile synthesis of Fe-doped SnO<sub>2</sub> porous hierarchical nanostructures and their enhanced lithium storage properties**

**Yuan Yan,<sup>a</sup> Feihu Du,<sup>b</sup> Xiaoping Shen,<sup>a,\*</sup> Zhenyuan Ji,<sup>a</sup> Hu Zhou,<sup>c</sup> Xuexi Sheng<sup>a</sup> and Guoxing Zhu<sup>a</sup>**

<sup>a</sup> *School of Chemistry and Chemical Engineering, Jiangsu University, Zhenjiang 212013, P. R. China*

<sup>b</sup> *School of Chemistry and Chemical Engineering, Shanghai Jiao Tong University, Shanghai 200240, P. R. China.*

<sup>c</sup> *School of Material Science and Engineering, Jiangsu University of Science and Technology, Zhenjiang 212003, P. R. China*

\*Corresponding author. E-mail: xiaopingshen@163.com

Table S1. Precursors of Sn<sub>m</sub>[Fe(CN)<sub>6</sub>]<sub>n</sub> obtained with different conditions.

| Initial feeding amount of SnCl <sub>2</sub> (mmol) | Initial feeding amount of K <sub>3</sub> Fe(CN) <sub>6</sub> (mmol) | * Sn/Fe molar ratio |
|----------------------------------------------------|---------------------------------------------------------------------|---------------------|
| 3                                                  | 2                                                                   | 2.09                |
| 6                                                  | 2                                                                   | 2.55                |
| 9                                                  | 2                                                                   | 2.88                |

\* The Sn/Fe molar ratios in the Sn<sub>m</sub>[Fe(CN)<sub>6</sub>]<sub>n</sub> samples were determined by EDX.

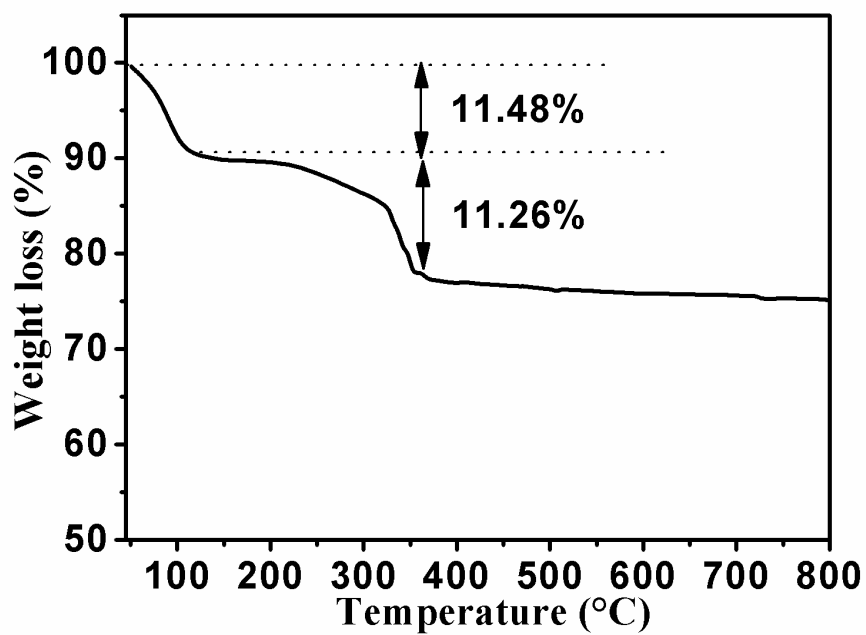

Fig. S1 TGA curve of  $\text{Sn}_m[\text{Fe}(\text{CN})_6]_n$  precursor with a heating rate of  $10\text{ }^\circ\text{C min}^{-1}$ .

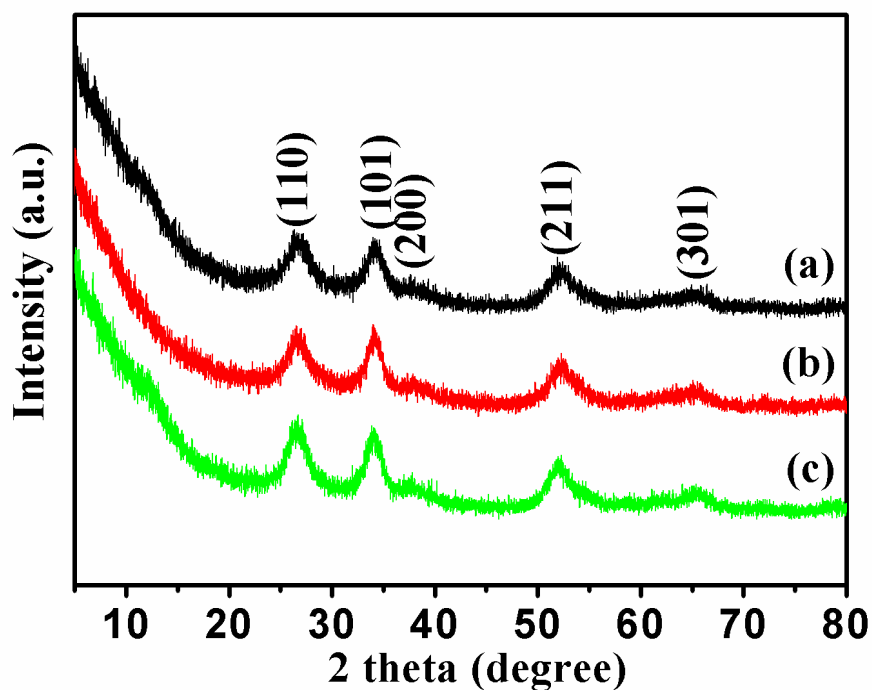

Fig. S2 XRD patterns of (a) SF1-350, (b) SF2-350 and (c) SF3-350.

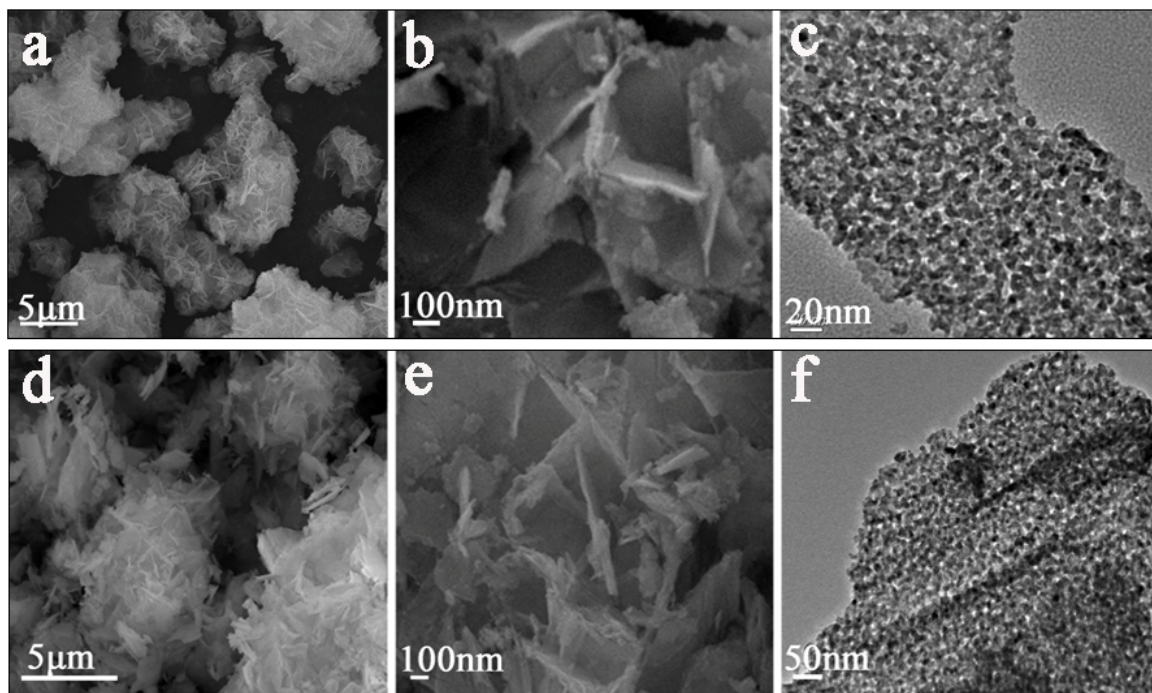

**Fig. S3** FESEM and TEM images of (a-c) SF1-450 and (d-f) SF1-650.

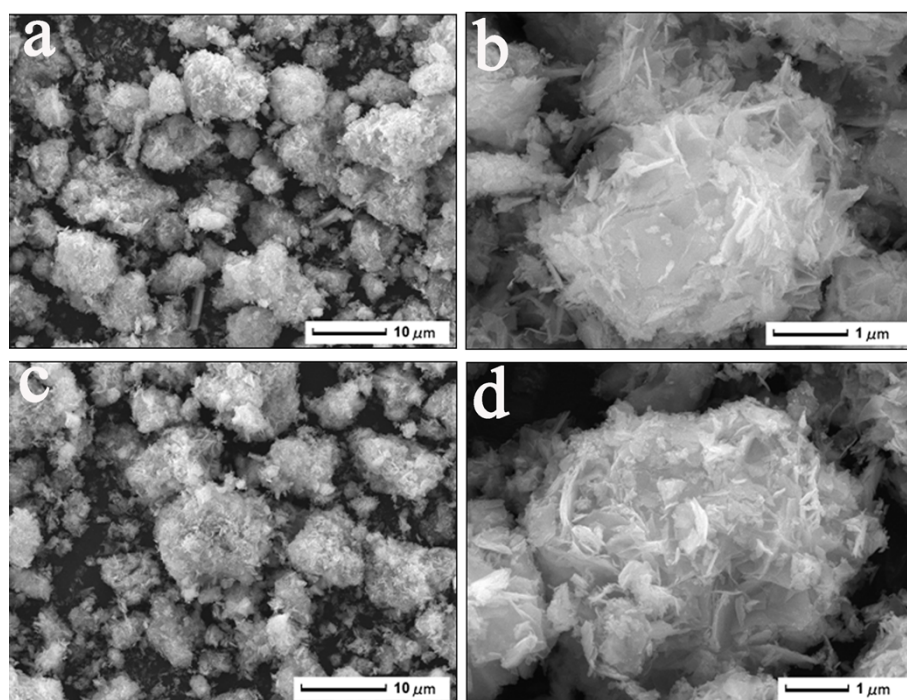

**Fig. S4** FESEM images of (a-c) SF2-350 and (d-f) SF3-350.

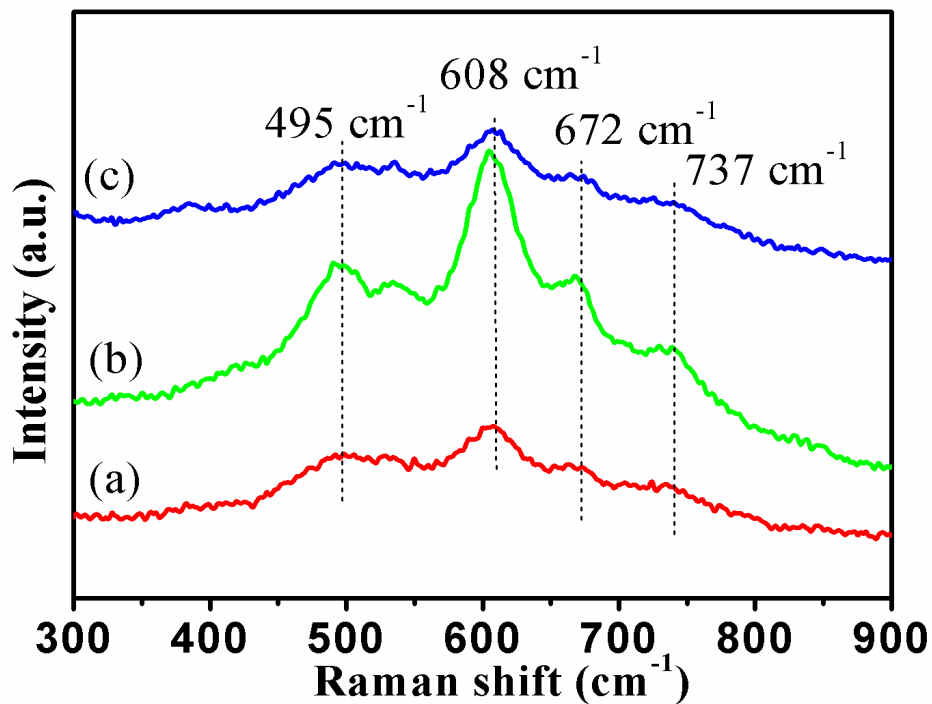

Fig. S5 Raman spectra of (a) SF1-350, (b) SF1-450 and (c) SF1-650.

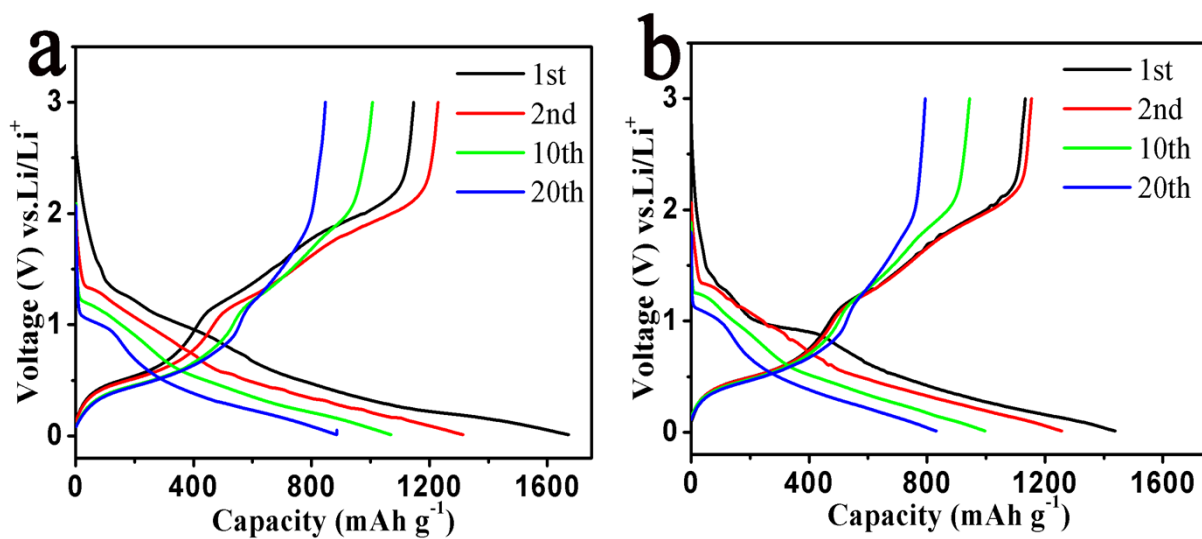

Fig. S6 Galvanostatic discharge/charge profiles of SF1-450 (a) and SF1-650 (b) at  $200 \text{ mA g}^{-1}$ .

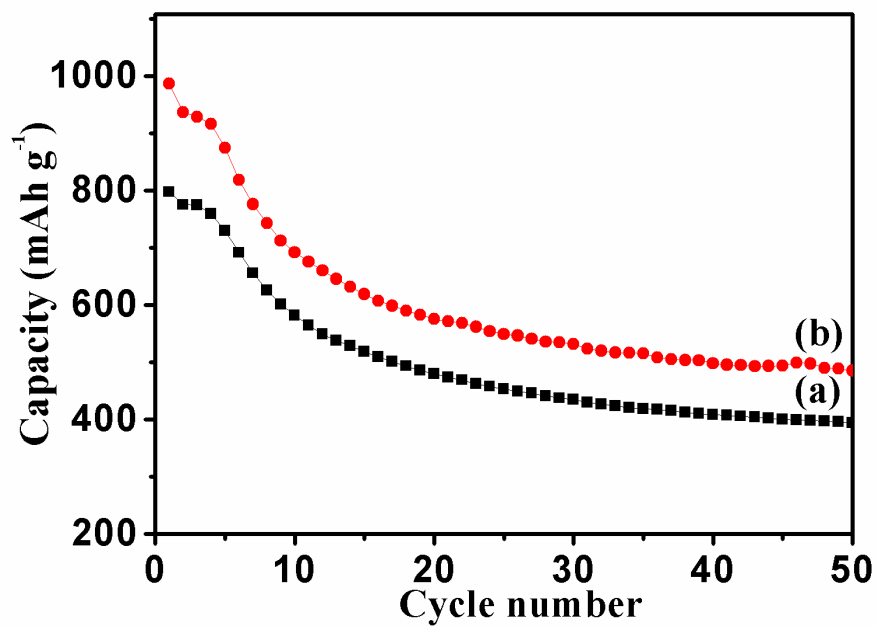

Fig. S7 Lithium storage properties of (a) SF2-350 and (b) SF3-350 at 200 mA g<sup>-1</sup>.

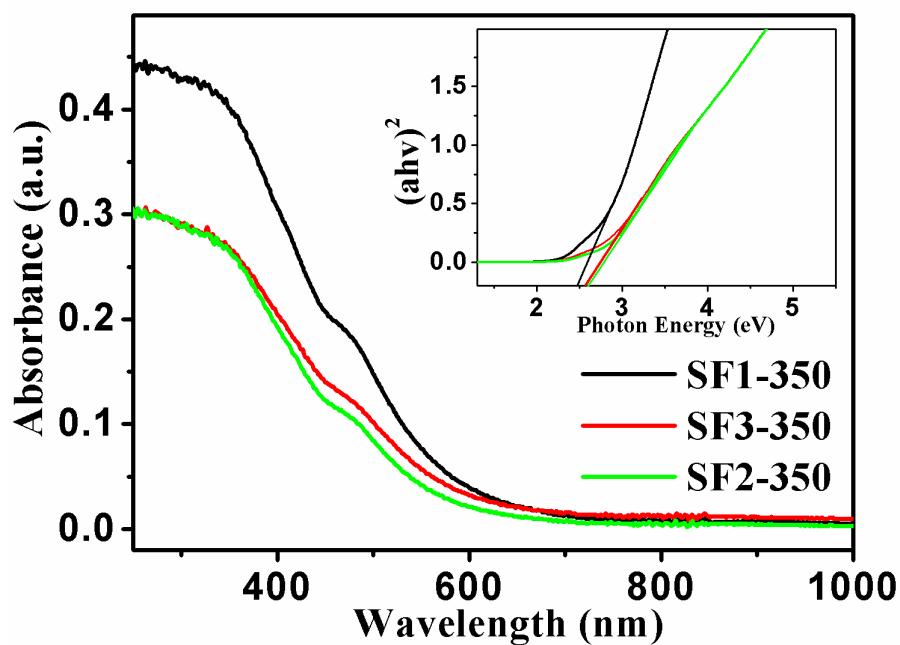

Fig. S8 UV-vis spectra of SF1-350, SF2-350, and SF3-350. Inset shows  $(ah\nu)^2$  vs. photon energy plots of SF1-350, SF2-350 and SF3-350.

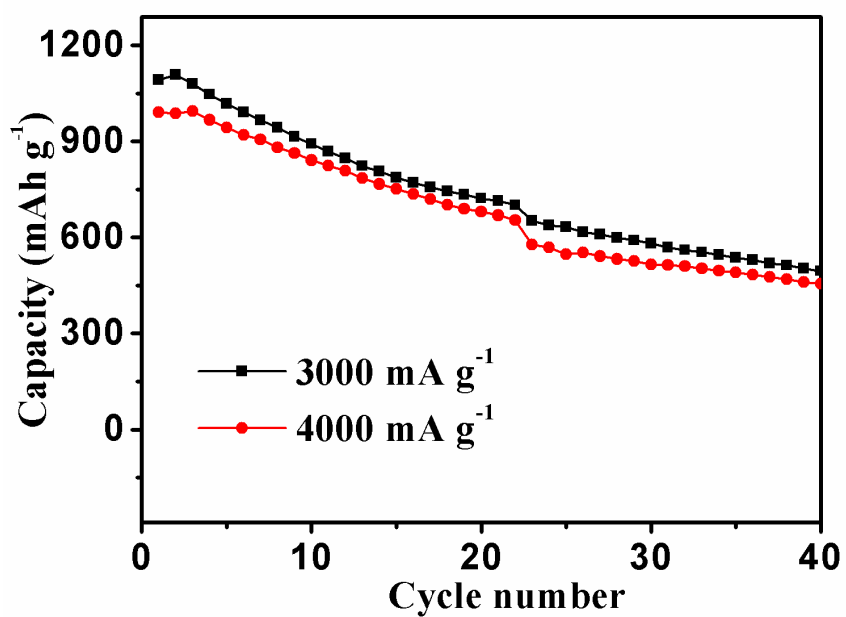

Fig. S9 Lithium storage properties of SF1-350 at the current density of 3000 and 4000 mA g<sup>-1</sup>, respectively.

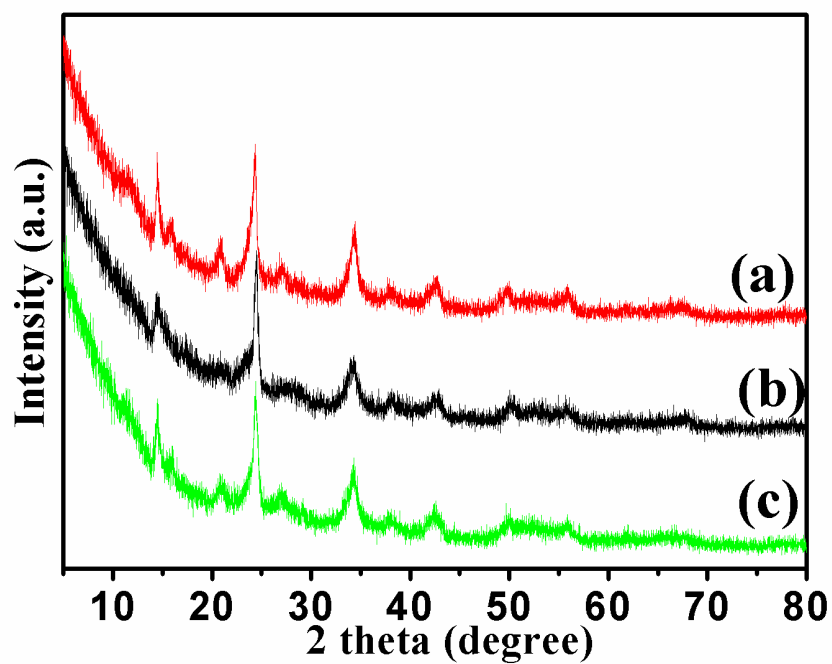

Fig. S10 XRD patterns of Sn<sub>m</sub>[Fe(CN)<sub>6</sub>]<sub>n</sub> (a) Sn/Fe=2.55; (b) Sn/Fe=2.09; (c) Sn/Fe=2.88
